# Supplementary material for: Complete Genome Sequence of 3-Chlorobenzoate-Degrading Bacterium Cupriavidus necator NH9 and Reclassification of the Strains of the Genera Cupriavidus and Ralstonia Based on Phylogenetic and Whole-Genome Sequence Analyses
Source: Front Microbiol. 2019 Feb 12;10:133. doi: 10.3389/fmicb.2019.00133 (PMC6379261; doi:10.3389/fmicb.2019.00133)
Supplement: Supplementary file 3 [file Table_3.XLSX]

## Sheet: Table S3
Table S3 Genome information of Cupriavidus and Ralstonia strains used in this study
Genus	Species	Strain	Phylotype Sequevar	# assembly_accession	Genome status	Genome size (Mb)	GC%	Contigs	Chromosome	Plasmid	CDSs	Source or reference
Cupriavidus	alkaliphilus	ASC-732a	-	GCF_900094595.1	Draft	6.12505	67.81	34	-	-	5510	Rojas-Rojas et al., 2016
	basilensis	4G11	-	GCF_000832305.1	Complete	8.42148	65.03	2	2	0	7549	Ray et al., 2015
		KF708	-	GCF_000876015.1	Draft	7.82608	68.81	62	-	-	6918	Suenaga et al., 2015
		OR16	-	GCF_000243095.1	Draft	8.54622	65.4	416	-	-	8037	Cserhati et al., 2012
	gilardii	CR3	-	GCF_001281465.1	Complete	5.57874	67.55	2	2	0	4918	Wang et al., 2015b
		JZ4	-	GCF_001658125.1	Draft	5.55992	67.7	28	-	-	4834	Lafi et al., 2016
	metallidurans	CH34a	-	GCF_000196015.1	Complete	6.91335	63.53	4	2	2	6438	Janssen et al., 2010
		Ni-2	-	GCF_002944765.1	Complete	6.95311	63.55	4	1	3	6478	Chonbuk National Univerity, Korea
		H1130	-	GCF_000496715.1	Draft	7.22316	63.54	102	-	-	6612	Monsieurs et al., 2013
		NA1	-	GCF_000709025.1	Draft	6.51462	63.69	238	-	-	6095	Monsieurs et al., 2014b
		NA4	-	GCF_000709045.1	Draft	7.29187	63.3	109	-	-	6926	Monsieurs et al., 2014b
		NBRC 101272	-	GCF_001598775.1	Draft	6.63861	63.8	63	-	-	6128	NITE Biological Resource Center, Japan
		NDB3NO24	-	GCF_001543455.1	Draft	6.54153	63.81	38	-	-	6040	Griffith University, Australia
		NE12	-	GCF_000709065.1	Draft	7.13298	63.64	87	-	-	6615	Monsieurs et al., 2014b
	nantongensis	X1a	-	GCF_001598055.1	Chromosome	7.13642	66.72	3	2	1	6484	Fang et al., 2016
	necator	H16	-	GCF_000009285.1	Complete	7.41668	66.34	3	2	1	6751	Pohlmann et al., 2006
		N-1a	-	GCF_000219215.1	Complete	8.48086	65.47	4	2	2	7871	Poehlein et al., 2011
		NH9	-	GCF_002011925.2	Complete	8.24694	65.48	4	2	2	7420	This study
		A5-1	-	GCF_000744095.1	Draft	9.74138	65.04	9	-	-	8978	DOE Joint Genome Institute, USA
		NBRC 102504	-	GCF_001598755.1	Draft	6.91493	66.62	124	-	-	6361	NITE Biological Resource Center, Japan
		PHE3-6	-	GCF_001853325.1	Draft	7.26781	66.33	118	-	-	6706	Yonezuka et al., 2016
	oxalaticus	NBRC 13593	-	GCF_001592245.1	Draft	6.64496	66.94	65	-	-	5946	NITE Biological Resource Center, Japan
	pauculus	KF709	-	GCF_000974605.1	Draft	6.8268	64	227	-	-	6310	Watanabe et al., 2015
		UM1	-	GCF_002858765.1	Draft	7.40282	64.77	38	-	-	6655	Putonti et al., 2018
	pinatubonensis	JMP134	-	GCF_000203875.1	Complete	7.25529	64.43	4	2	2	6619	Lykidis et al., 2010
	taiwanensis	LMG19424a	-	GCF_000069785.1	Chromosome	6.47652	66.99	3	2	1	5834	Amadou et al., 2008
		STM 6018	-	GCF_000472465.1	Draft	6.55364	66.9	80	-	-	5923	DOE Joint Genome Institute, USA
		STM6070	-	GCF_000372525.1	Draft	6.77177	67.21	107	-	-	6186	DOE Joint Genome Institute, USA
	sp.	USMAA1020	-	GCF_001854325.1	Complete	7.94945	68.47	3	2	1	7054	Shafie et al., 2017
		USMAA2-4	-	GCF_001854305.1	Complete	8.69823	67.98	3	2	1	7787	Shafie et al., 2017
		USMAHM13	-	GCF_001854285.1	Complete	7.82082	68.58	3	2	1	6831	Shafie et al., 2017
		amp6	-	GCF_000426345.1	Draft	7.57956	65.46	260	-	-	7017	De Meyer et al., 2015b
		BIS7	-	GCF_000292345.1	Draft	5.87142	63.85	138	-	-	5278	Hong et al., 2012
		D384	-	GCF_001652915.1	Draft	6.83523	64.95	134	-	-	6150	Watahiki and Kimura, 2017
		GA3-3	-	GCF_000389805.1	Draft	6.76618	66.64	47	-	-	6217	Pearce et al., 2013
		HMR-1	-	GCF_000319775.1	Draft	6.64238	63.85	285	-	-	6165	Li et al., 2013
		HPC(L)	-	GCF_000307735.3	Draft	5.49256	67.6	475	-	-	4991	National Environmental Engineering Research Institute, India
		IDO	-	GCF_000812465.1	Draft	7.9266	64.58	206	-	-	7373	Ma et al., 2015
		OV038	-	GCF_900112215.1	Draft	5.96167	66.82	28	-	-	5333	DOE Joint Genome Institute, USA
		OV096	-	GCF_900115455.1	Draft	5.96044	66.82	27	-	-	5337	DOE Joint Genome Institute, USA
		SHE	-	GCF_000812445.1	Draft	7.06924	63.63	117	-	-	6543	Qu et al., 2015
		SK-3	-	GCF_000611145.1	Draft	7.42915	64.9	299	-	-	6827	Vilo et al., 2014a
		SK-4	-	GCF_000611125.1	Draft	7.72023	66.18	247	-	-	7162	Vilo et al., 2014b
		UYPR2.512	-	GCF_000379565.1	Draft	7.85895	65.25	365	-	-	7416	De Meyer et al., 2015a
		WS	-	GCF_000395345.1	Draft	7.89301	68.64	785	-	-	7330	Wang et al., 2015a
		YR651	-	GCF_900101625.1	Draft	6.96012	64.79	46	-	-	6303	DOE Joint Genome Institute, USA
Ralstonia	insidiosa	ATCC 49129	-	GCF_001663855.1	Complete	6.177	62.95	4	2	2	5821	Xu et al., 2016
		FC1138	-	GCF_001653935.1	Complete	5.98776	63.64	3	2	1	5572	Xu et al., 2016
		WCHRI065162	-	GCF_002939165.1	Draft	5.92466	63.41	46	-	-	5594	Sichuan University, China
		WCHRI065437	-	GCF_002939035.1	Draft	6.11529	63.63	39	-	-	5750	Sichuan University, China
	mannitolilytica	SN82F48	-	GCF_000954135.1	Complete	5.0723	65.49	3	2	1	4737	University of California, USA
		SN83A39	-	GCF_001628775.1	Complete	4.84299	66.04	2	2	0	4544	University of California, USA
		GML-Rals1-TR	-	GCF_002863525.1	Draft	5.0844	65.54	4	-	-	4747	Erciyes University, Turkey
		MRY14-0246	-	GCF_000953875.1	Draft	4.66923	65.78	48	-	-	4344	Suzuki et al., 2015
		WCHRM065694	-	GCF_002939115.1	Draft	4.78304	65.69	67	-	-	4451	Sichuan University, China
		WCHRM065837	-	GCF_002939145.1	Draft	4.99063	65.79	37	-	-	4696	Sichuan University, China
	pickettii	12D	-	GCF_000023425.1	Complete	5.68536	63.3	5	2	3	5432	DOE Joint Genome Institute, USA
		12J	-	GCF_000020205.1	Complete	5.32573	63.65	3	2	1	5005	DOE Joint Genome Institute, USA
		DTP0602	-	GCF_000471925.1	Complete	8.12585	65.91	3	3	0	7228	Ohtsubo et al., 2013
		FDAARGOS_410	-	GCF_002393485.1	Complete	4.81805	65.9	2	2	0	4441	US Food and Drug Administration, USA
		52	-	GCF_002849525.1	Draft	5.53005	64.43	13	-	-	5176	Zhejiang University, China
		5_7_47FAA	-	GCF_000165085.1	Draft	5.24982	63.46	32	-	-	4966	Broad Institute of MIT and Harvard, USA
		ATCC 27511a	-	GCF_000743455.1	Draft	4.7656	63.92	1	-	-	4436	Daligault et al., 2014
		CW2	-	GCF_000607185.1	Draft	5.49087	63.65	32	-	-	5181	Monsieurs et al., 2014a
		H2Cu2	-	GCF_001699795.1	Draft	5.20029	63.99	40	-	-	4869	Vaz-Moreira et al., 2016
		H2Cu5	-	GCF_001699815.1	Draft	5.24436	63.7	113	-	-	4967	Vaz-Moreira et al., 2016
		ICMP-8657	-	GCF_002516395.1	Draft	5.4844	63.55	72	-	-	5271	Paterson and Gross, 2018
		NBRC 102503	-	GCF_001544155.1	Draft	4.73306	63.97	52	-	-	4403	NITE Biological Resource Center, Japan
		OR214	-	GCF_000372665.1	Draft	5.48059	63.41	46	-	-	5259	Utturkar et al., 2013
		SSH4	-	GCF_000607165.1	Draft	5.74654	63.29	38	-	-	5419	Monsieurs et al., 2014a
	solanacearum	GMI1000	I-18	GCF_000009125.1	Complete	5.81092	66.98	2	1	1	5135	Salanoubat et al., 2002
		CQPS-1	I	GCF_002220465.1	Complete	5.89344	66.84	2	1	1	5169	Liu et al., 2017
		EP1	I	GCF_001891105.1	Complete	6.04297	66.72	2	1	1	5324	Li et al., 2016
		FJAT-91	I	GCF_002155245.1	Complete	5.87409	66.85	2	1	1	5154	Chen et al., 2017b
		FJAT-1458	I	GCF_001887535.1	Complete	6.0599	66.79	2	1	1	5368	Chen et al., 2017a
		FQY_4	I	GCF_000348545.1	Chromosome	5.80525	66.81	2	1	-	5125	Cao et al., 2013
		Rs-09-161	I	GCF_000671335.1	Chromosome	5.75792	66.55	75	1	-	5113	Ramesh et al., 2014
		Rs-10-244	I	GCF_000671315.1	Chromosome	5.68831	66.71	36	1	-	5072	Ramesh et al., 2014
		P781	I-14	GCF_001644865.1	Draft	5.62164	67.12	298	-	-	5087	University of Florida, USA
		UW757	I-14	GCF_001645725.1	Draft	5.73693	67.02	222	-	-	5125	Weibel et al., 2016
		CaRs-Mep	I	GCF_001855495.1	Draft	5.71855	66.97	253	-	-	5154	Kumar et al., 2017
		SD54	I	GCF_000430925.2	Draft	5.64732	66.97	165	-	-	5083	Shan et al., 2013
		Y45	I	GCF_000223115.1	Draft	5.57841	66.91	499	-	-	5292	Li et al., 2011
		UW25a	IIA-7	GCF_002251695.1	Complete	5.77066	66.39	2	1	1	5109	Hayes et al., 2017
		Grenada 9-1	IIA-6	GCF_000825845.1	Draft	5.47946	65.81	1	-	-	4977	Ailloud et al., 2015
		B50	IIA-24	GCF_000825785.1	Draft	5.59607	65.15	1	-	-	5244	Ailloud et al., 2015
		IBSBF1900	IIA-24	GCF_001373275.1	Draft	5.8126	65.17	1	-	-	5431	CIRAD, France
		CIP120	IIA-38	GCF_001644795.1	Draft	5.67154	66.56	145	-	-	5088	Bocsanczy et al., 2017
		P597	IIA-38	GCF_001644805.1	Draft	5.64802	66.45	530	-	-	5276	Bocsanczy et al., 2017
		UW551	IIB-1	GCF_002251655.1	Complete	5.47898	66.55	2	1	1	4774	Hayes et al., 2017
		UY031	IIB-1	GCF_001299555.1	Complete	5.41168	66.61	2	1	1	4729	Guarischi-Sousa et al., 2016
		IBSBF1503	IIB-4	GCF_001587155.1	Complete	5.53025	66.64	2	1	1	4836	Ailloud et al., 2015
		Po82	IIB-4	GCF_000215325.1	Complete	5.43026	66.67	2	1	1	4800	Xu et al., 2011
		UW163	IIB-4	GCF_001587135.1	Complete	5.59624	66.53	4	1	3	4945	Ailloud et al., 2015
		CFBP3858	IIB-1	GCF_001373335.1	Draft	5.83599	65.69	1	-	-	5352	CIRAD, France
		IPO1609	IIB-1	GCF_001050995.1	Draft	5.31852	64.85	10	-	-	4647	Guidot et al., 2009
		NCPPB 909	IIB-1	GCF_000710695.1	Draft	5.25188	66.73	215	-	-	4667	Yuan et al., 2015
		POPS2	IIB-1	GCF_000750585.1	Draft	5.58079	66.38	703	-	-	5195	Clarke et al., 2015
		RS2	IIB-1	GCF_001373295.1	Draft	4.78826	66.73	1	-	-	4248	Patil et al., 2017
		UW365	IIB-1	GCF_001696865.1	Draft	5.26452	66.72	136	-	-	4619	MRIGlobal, USA
		UW491	IIB-1	GCF_001696845.1	Draft	5.24293	66.66	118	-	-	4630	MRIGlobal, USA
		NCPPB 282	IIB-2	GCF_000750575.1	Draft	5.25457	66.72	181	-	-	4700	Clarke et al., 2015
		CFBP1416	IIB-3	GCF_000825925.1	Draft	5.74427	65.87	1	-	-	5329	Ailloud et al., 2015
		CIP417	IIB-3	GCF_000825825.1	Draft	5.52371	66.02	1	-	-	5057	Ailloud et al., 2015
		MolK2	IIB-3	GCF_000212635.3	Draft	5.55188	66.68	349	-	-	5149	Guidot et al., 2009
		CFBP6783	IIB-4	GCF_001644815.1	Draft	5.55718	66.64	178	-	-	5002	Ailloud et al., 2015
		P673	IIB-4	GCF_000525615.1	Draft	5.31873	66.89	251	-	-	4798	Bocsanczy et al., 2014
		UW179	IIB-4	GCF_000825805.1	Draft	5.42641	65.99	1	-	-	4988	Ailloud et al., 2015
		23-10BR	IIB-27	GCF_000749995.1	Draft	5.62936	66.66	94	-	-	4997	Clarke et al., 2015
		CFBP7014	IIB-59	GCF_001373255.1	Draft	5.62106	65.78	1	-	-	5166	CIRAD, France
		CFIA906	IIB	GCF_000710135.2	Draft	5.24095	66.76	165	-	-	4661	Yuan et al., 2015
		CMR15	III	GCF_000427195.1	Chromosome	5.59037	66.79	3	1	2	4965	Remenant et al., 2010
		CFBP3059	III-48	GCF_001644855.1	Draft	5.39639	66.9	399	-	-	4991	Guinard et al., 2016
		PSI07a	IV	GCF_000283475.1	Complete	5.60562	66.32	2	1	1	4905	Remenant et al., 2010
		KACC10709	NAb	GCF_001708525.1	Complete	5.60824	67.02	2	1	1	4942	National Institute of Agricultural Science, South Korea
		KACC 10722	NAb	GCF_001586135.1	Complete	5.46326	66.43	2	1	1	4845	National Institute of Agricultural Science, South Korea
		OE1-1	NAb	GCF_001879565.1	Complete	5.76297	66.91	2	1	1	5050	Kochi University, Japan
		RS 488	NAb	GCF_002501565.1	Complete	5.41169	66.55	2	1	1	4746	The Brazilian Agricultural Research Corporation, Brazil
		RS 489	NAb	GCF_002549815.1	Complete	5.4115	66.54	2	1	1	4727	The Brazilian Agricultural Research Corporation, Brazil
		RSCM	NAb	GCF_002894285.1	Complete	6.00071	66.69	2	1	1	5346	Plant Protection Research Institute, China
		SEPPX05	NAb	GCF_002162015.1	Complete	5.99693	66.84	2	1	1	5427	Li et al., 2018
		YC40-M	NAb	GCF_001663415.1	Complete	5.75213	66.74	2	1	1	5069	Plant Protection Research Institute, China
		58_RSOL	NAb	GCF_001065525.1	Draft	6.17614	63.41	224	-	-	5808	University of Washington, USA
		GEO_6	NAb	GCF_002894765.1	Draft	5.1634	66.83	123	-	-	4571	National Center for Disease Control and Public Health, Georgia
		GEO_55	NAb	GCF_002894845.1	Draft	5.19214	66.76	168	-	-	4640	National Center for Disease Control and Public Health, Georgia
		GEO_57	NAb	GCF_002029885.1	Draft	5.18985	66.8	145	-	-	4589	Kotorashvili et al., 2017
		GEO_81	NAb	GCF_002894785.1	Draft	5.06353	66.77	135	-	-	4476	National Center for Disease Control and Public Health, Georgia
		GEO_96	NAb	GCF_002029895.1	Draft	5.19244	66.81	129	-	-	4573	Kotorashvili et al., 2017
		GEO_99	NAb	GCF_002029865.1	Draft	5.21485	66.8	147	-	-	4607	Kotorashvili et al., 2017
		GEO_230	NAb	GCF_002894795.1	Draft	4.81612	66.76	125	-	-	4244	National Center for Disease Control and Public Health, Georgia
		GEO_304	NAb	GCF_002894775.1	Draft	5.11707	66.82	110	-	-	4645	National Center for Disease Control and Public Health, Georgia
		PSS4	NAb	GCF_001876985.1	Draft	5.60928	67.02	134	-	-	4998	Guinard et al., 2016
		PSS190	NAb	GCF_001870825.1	Draft	5.47242	67.02	189	-	-	4904	University of Exeter, United Kingdom
		PSS216	NAb	GCF_001876975.1	Draft	5.8713	66.71	224	-	-	5288	University of Exeter, United Kingdom
		PSS1308	NAb	GCF_001870805.1	Draft	5.6795	66.94	162	-	-	5078	University of Exeter, United Kingdom
		RD15	NAb	GCF_001854265.1	Draft	5.48625	67.04	139	-	-	4839	University of Exeter, United Kingdom
		Rs-T02	NAb	GCF_001484095.1	Draft	5.80424	66.92	169	-	-	5190	Zou et al., 2016
		UTT-25	NAb	GCF_002930085.1	Draft	5.82478	66.79	1058	-	-	5786	Indian Agricultural Research Institute, India
		UW24	NAb	GCF_001696855.1	Draft	5.18378	66.73	124	-	-	4545	MRIGlobal, USA
		UW181	NAb	GCF_001373315.1	Draft	5.43669	65.76	1	-	-	4938	CIRAD, France
	sp.	25mfcol4.1	-	GCF_900104095.1	Draft	6.3374	65.58	44	-	-	5658	DOE Joint Genome Institute, USA
		5_2_56FAA	-	GCF_000227255.2	Draft	5.25477	63.52	17	-	-	4911	Broad Institute of MIT and Harvard, USA
		A12	-	GCF_000801955.1	Draft	6.10471	63.47	60	-	-	5596	University of Malaya, Malaysia
		AU12-08	-	GCF_000442475.1	Draft	6.22915	63.53	78	-	-	5816	Zhang et al., 2014
		MD27	-	GCF_001078575.1	Draft	5.91732	63.43	70	-	-	5597	Zhu et al., 2015
		NFACC01	-	GCF_900115545.1	Draft	5.36575	63.77	25	-	-	4956	DOE Joint Genome Institute, USA
		NT80	-	GCF_001485395.1	Draft	5.78939	63.6	176	-	-	5461	Akanuma et al., 2016
		PBA	-	GCF_000272025.1	Draft	3.82911	63.66	48	-	-	3493	Gan et al., 2012
		UNC404CL21Col	-	GCF_000620465.1	Draft	5.08745	64.58	11	-	-	4673	DOE Joint Genome Institute, USA
		UNCCL144	-	GCF_900099845.1	Draft	5.25161	63.63	51	-	-	4929	DOE Joint Genome Institute, USA
aType strains that are proposed in List of prokaryotic names with standing in nomenclature (http://www.bacterio.net/index.html).
bNot assigned.
References
Ailloud, F., Lowe, T., Cellier, G., Roche, D., Allen, C., and Prior, P. (2015). Comparative genomic analysis of Ralstonia solanacearum reveals candidate genes for host specificity. BMC Genomics 16, 270. doi: 10.1186/s12864-015-1474-8.
Akanuma, G., Yoshizawa, R., Nagakura, M., Shiwa, Y., Watanabe, S., Yoshikawa, H., et al. (2016). EliA is required for inducing the stearyl alcohol-mediated expression of secretory proteins and production of polyester in Ralstonia sp. NT80. Microbiology 162(2), 408-419. doi: 10.1099/mic.0.000225.
Amadou, C., Pascal, G., Mangenot, S., Glew, M., Bontemps, C., Capela, D., et al. (2008). Genome sequence of the beta-rhizobium Cupriavidus taiwanensis and comparative genomics of rhizobia. Genome Res 18(9), 1472-1483. doi: 10.1101/gr.076448.108.
Bocsanczy, A.M., Huguet-Tapia, J.C., and Norman, D.J. (2014). Whole-Genome Sequence of Ralstonia solanacearum P673, a Strain Capable of Infecting Tomato Plants at Low Temperatures. Genome Announc 2(1). doi: 10.1128/genomeA.00106-14.
Bocsanczy, A.M., Huguet-Tapia, J.C., and Norman, D.J. (2017). Comparative Genomics of Ralstonia solanacearum Identifies Candidate Genes Associated with Cool Virulence. Front Plant Sci 8, 1565. doi: 10.3389/fpls.2017.01565.
Cao, Y., Tian, B., Liu, Y., Cai, L., Wang, H., Lu, N., et al. (2013). Genome Sequencing of Ralstonia solanacearum FQY_4, Isolated from a Bacterial Wilt Nursery Used for Breeding Crop Resistance. Genome Announc 1(3). doi: 10.1128/genomeA.00125-13.
Chen, D., Liu, B., Zhu, Y., Wang, J., Chen, Z., Che, J., et al. (2017a). Complete Genome Sequence of Ralstonia solanacearum FJAT-1458, a Potential Biocontrol Agent for Tomato Wilt. Genome Announc 5(14). doi: 10.1128/genomeA.00070-17.
Chen, D., Liu, B., Zhu, Y., Zhang, H., Chen, Z., Zheng, X., et al. (2017b). Complete Genome Sequence of Ralstonia solanacearum FJAT-91, a High-Virulence Pathogen of Tomato Wilt. Genome Announc 5(37). doi: 10.1128/genomeA.00900-17.
Clarke, C.R., Studholme, D.J., Hayes, B., Runde, B., Weisberg, A., Cai, R., et al. (2015). Genome-Enabled Phylogeographic Investigation of the Quarantine Pathogen Ralstonia solanacearum Race 3 Biovar 2 and Screening for Sources of Resistance Against Its Core Effectors. Phytopathology 105(5), 597-607. doi: 10.1094/phyto-12-14-0373-r.
Cserhati, M., Kriszt, B., Szoboszlay, S., Toth, A., Szabo, I., Tancsics, A., et al. (2012). De novo genome project of Cupriavidus basilensis OR16. J Bacteriol 194(8), 2109-2110. doi: 10.1128/jb.06752-11.
Daligault, H.E., Davenport, K.W., Minogue, T.D., Broomall, S.M., Bruce, D.C., Chain, P.S., et al. (2014). Draft Genome Assembly of Ralstonia pickettii Type Strain K-288 (ATCC 27853). Genome Announc 2(5). doi: 10.1128/genomeA.00973-14.
De Meyer, S.E., Fabiano, E., Tian, R., Van Berkum, P., Seshadri, R., Reddy, T., et al. (2015a). High-quality permanent draft genome sequence of the Parapiptadenia rigida-nodulating Cupriavidus sp. strain UYPR2.512. Stand Genomic Sci 10, 13. doi: 10.1186/1944-3277-10-13.
De Meyer, S.E., Parker, M., Van Berkum, P., Tian, R., Seshadri, R., Reddy, T.B., et al. (2015b). High-quality permanent draft genome sequence of the Mimosa asperata - nodulating Cupriavidus sp. strain AMP6. Stand Genomic Sci 10, 80. doi: 10.1186/s40793-015-0074-1.
Fang, L.C., Chen, Y.F., Zhou, Y.L., Wang, D.S., Sun, L.N., Tang, X.Y., et al. (2016). Complete genome sequence of a novel chlorpyrifos degrading bacterium, Cupriavidus nantongensis X1. J Biotechnol 227, 1-2. doi: 10.1016/j.jbiotec.2016.04.012.
Gan, H.M., Shahir, S., and Yahya, A. (2012). Cloning and functional analysis of the genes coding for 4-aminobenzenesulfonate 3,4-dioxygenase from Hydrogenophaga sp. PBC. Microbiology 158(Pt 8), 1933-1941. doi: 10.1099/mic.0.059550-0.
Guarischi-Sousa, R., Puigvert, M., Coll, N.S., Siri, M.I., Pianzzola, M.J., Valls, M., et al. (2016). Complete genome sequence of the potato pathogen Ralstonia solanacearum UY031. Stand Genomic Sci 11, 7. doi: 10.1186/s40793-016-0131-4.
Guidot, A., Elbaz, M., Carrere, S., Siri, M.I., Pianzzola, M.J., Prior, P., et al. (2009). Specific genes from the potato brown rot strains of Ralstonia solanacearum and their potential use for strain detection. Phytopathology 99(9), 1105-1112. doi: 10.1094/phyto-99-9-1105.
Guinard, J., Vinatzer, B.A., Poussier, S., Lefeuvre, P., and Wicker, E. (2016). Draft Genome Sequences of Nine Strains of Ralstonia solanacearum Differing in Virulence to Eggplant (Solanum melongena). Genome Announc 4(1). doi: 10.1128/genomeA.01415-15.
Hayes, M.M., MacIntyre, A.M., and Allen, C. (2017). Complete Genome Sequences of the Plant Pathogens Ralstonia solanacearum Type Strain K60 and R. solanacearum Race 3 Biovar 2 Strain UW551. Genome Announc 5(40). doi: 10.1128/genomeA.01088-17.
Hong, K.W., Thinagaran, D., Gan, H.M., Yin, W.F., and Chan, K.G. (2012). Whole-genome sequence of Cupriavidus sp. strain BIS7, a heavy-metal-resistant bacterium. J Bacteriol 194(22), 6324. doi: 10.1128/jb.01608-12.
Janssen, P.J., Van Houdt, R., Moors, H., Monsieurs, P., Morin, N., Michaux, A., et al. (2010). The complete genome sequence of Cupriavidus metallidurans strain CH34, a master survivalist in harsh and anthropogenic environments. PLoS One 5(5), e10433. doi: 10.1371/journal.pone.0010433.
Kotorashvili, A., Meparishvili, G., Gogoladze, G., Kotaria, N., Muradashvili, M., Zarandia, M., et al. (2017). Three Draft Genome Sequences of the Bacterial Plant Pathogen Ralstonia solanacearum, Isolated in Georgia. Genome Announc 5(23). doi: 10.1128/genomeA.00480-17.
Kumar, A., Munjal, V., Sheoran, N., Prameela, T.P., Suseelabhai, R., Aggarwal, R., et al. (2017). Draft Genome Sequence of Highly Virulent Race 4/Biovar 3 of Ralstonia solanacearum CaRs_Mep Causing Bacterial Wilt in Zingiberaceae Plants in India. Genome Announc 5(1). doi: 10.1128/genomeA.01420-16.
Lafi, F.F., Bokhari, A., Alam, I., Bajic, V.B., Hirt, H., and Saad, M.M. (2016). Draft Genome Sequence of the Plant Growth-Promoting Cupriavidus gilardii Strain JZ4 Isolated from the Desert Plant Tribulus terrestris. Genome Announc 4(4). doi: 10.1128/genomeA.00678-16.
Li, L.G., Cai, L., and Zhang, T. (2013). Genome of Cupriavidus sp. HMR-1, a Heavy Metal-Resistant Bacterium. Genome Announc 1(1). doi: 10.1128/genomeA.00202-12.
Li, P., Wang, D., Yan, J., Zhou, J., Deng, Y., Jiang, Z., et al. (2016). Genomic Analysis of Phylotype I Strain EP1 Reveals Substantial Divergence from Other Strains in the Ralstonia solanacearum Species Complex. Front Microbiol 7, 1719. doi: 10.3389/fmicb.2016.01719.
Li, X., Huang, X., Chen, G., Zou, L., Wei, L., and Hua, J. (2018). Complete genome sequence of the sesame pathogen Ralstonia solanacearum strain SEPPX 05. Genes Genomics 40(6), 657-668. doi: 10.1007/s13258-018-0667-3.
Li, Z., Wu, S., Bai, X., Liu, Y., Lu, J., Liu, Y., et al. (2011). Genome sequence of the tobacco bacterial wilt pathogen Ralstonia solanacearum. J Bacteriol 193(21), 6088-6089. doi: 10.1128/jb.06009-11.
Liu, Y., Tang, Y., Qin, X., Yang, L., Jiang, G., Li, S., et al. (2017). Genome Sequencing of Ralstonia solanacearum CQPS-1, a Phylotype I Strain Collected from a Highland Area with Continuous Cropping of Tobacco. Front Microbiol 8, 974. doi: 10.3389/fmicb.2017.00974.
Lykidis, A., Perez-Pantoja, D., Ledger, T., Mavromatis, K., Anderson, I.J., Ivanova, N.N., et al. (2010). The complete multipartite genome sequence of Cupriavidus necator JMP134, a versatile pollutant degrader. PLoS One 5(3), e9729. doi: 10.1371/journal.pone.0009729.
Ma, Q., Qu, Y., Zhang, Z., Li, P., and Tang, H. (2015). Genome Sequence of an Efficient Indole-Degrading Bacterium, Cupriavidus sp. Strain IDO, with Potential Polyhydroxyalkanoate Production Applications. Genome Announc 3(2). doi: 10.1128/genomeA.00102-15.
Monsieurs, P., Mijnendonckx, K., Provoost, A., Venkateswaran, K., Ott, C.M., Leys, N., et al. (2014a). Draft Genome Sequences of Ralstonia pickettii Strains SSH4 and CW2, Isolated from Space Equipment. Genome Announc 2(5). doi: 10.1128/genomeA.00887-14.
Monsieurs, P., Mijnendonckx, K., Provoost, A., Venkateswaran, K., Ott, C.M., Leys, N., et al. (2014b). Genome Sequences of Cupriavidus metallidurans Strains NA1, NA4, and NE12, Isolated from Space Equipment. Genome Announc 2(4). doi: 10.1128/genomeA.00719-14.
Monsieurs, P., Provoost, A., Mijnendonckx, K., Leys, N., Gaudreau, C., and Van Houdt, R. (2013). Genome Sequence of Cupriavidus metallidurans Strain H1130, Isolated from an Invasive Human Infection. Genome Announc 1(6). doi: 10.1128/genomeA.01051-13.
Ohtsubo, Y., Fujita, N., Nagata, Y., Tsuda, M., Iwasaki, T., and Hatta, T. (2013). Complete Genome Sequence of Ralstonia pickettii DTP0602, a 2,4,6-Trichlorophenol Degrader. Genome Announc 1(6). doi: 10.1128/genomeA.00903-13.
Paterson, J., and Gross, H. (2018). Draft Genome Sequence and Annotation of the Phytopathogenic Ralstonia pickettii (Previously Burkholderia glumae) Strain ICMP-8657. Genome Announc 6(10). doi: 10.1128/genomeA.00128-18.
Patil, V.U., Girimalla, V., Sagar, V., Chauhan, R.S., and Chakrabarti, S.K. (2017). Genome sequencing of four strains of Phylotype I, II and IV of Ralstonia solanacearum that cause potato bacterial wilt in India. Braz J Microbiol 48(2), 193-195. doi: 10.1016/j.bjm.2016.10.016.
Pearce, S.L., Pushiri, H., Oakeshott, J.G., Russell, R.J., and Pandey, G. (2013). Draft Genome Sequence of Ralstonia sp. Strain GA3-3, Isolated from Australian Suburban Soil. Genome Announc 1(4). doi: 10.1128/genomeA.00414-13.
Poehlein, A., Kusian, B., Friedrich, B., Daniel, R., and Bowien, B. (2011). Complete genome sequence of the type strain Cupriavidus necator N-1. J Bacteriol 193(18), 5017. doi: 10.1128/jb.05660-11.
Pohlmann, A., Fricke, W.F., Reinecke, F., Kusian, B., Liesegang, H., Cramm, R., et al. (2006). Genome sequence of the bioplastic-producing "Knallgas" bacterium Ralstonia eutropha H16. Nat Biotechnol 24(10), 1257-1262. doi: 10.1038/nbt1244.
Putonti, C., Polley, N., and Castignetti, D. (2018). Draft Genome Sequence of an Active Heterotrophic Nitrifier-Denitrifier, Cupriavidus pauculus UM1. Genome Announc 6(6). doi: 10.1128/genomeA.00028-18.
Qu, Y., Shen, E., Ma, Q., Zhang, Z., Liu, Z., Shen, W., et al. (2015). Biodegradation of indole by a newly isolated Cupriavidus sp. SHE. J Environ Sci (China) 34, 126-132. doi: 10.1016/j.jes.2015.01.023.
Ramesh, R., Gaitonde, S., Achari, G., Asolkar, T., Singh, N.P., Carrere, S., et al. (2014). Genome Sequencing of Ralstonia solanacearum Biovar 3, Phylotype I, Strains Rs-09-161 and Rs-10-244, Isolated from Eggplant and Chili in India. Genome Announc 2(3). doi: 10.1128/genomeA.00323-14.
Ray, J., Waters, R.J., Skerker, J.M., Kuehl, J.V., Price, M.N., Huang, J., et al. (2015). Complete Genome Sequence of Cupriavidus basilensis 4G11, Isolated from the Oak Ridge Field Research Center Site. Genome Announc 3(3). doi: 10.1128/genomeA.00322-15.
Remenant, B., Coupat-Goutaland, B., Guidot, A., Cellier, G., Wicker, E., Allen, C., et al. (2010). Genomes of three tomato pathogens within the Ralstonia solanacearum species complex reveal significant evolutionary divergence. BMC Genomics 11, 379. doi: 10.1186/1471-2164-11-379.
Rojas-Rojas, F.U., Huntemann, M., Clum, A., Pillay, M., Palaniappan, K., Varghese, N., et al. (2016). Draft Genome Sequence of Heavy Metal-Resistant Cupriavidus alkaliphilus ASC-732T, Isolated from Agave Rhizosphere in the Northeast of Mexico. Genome Announc 4(5). doi: 10.1128/genomeA.01013-16.
Salanoubat, M., Genin, S., Artiguenave, F., Gouzy, J., Mangenot, S., Arlat, M., et al. (2002). Genome sequence of the plant pathogen Ralstonia solanacearum. Nature 415(6871), 497-502. doi: 10.1038/415497a.
Shafie, N.A., Lau, N.S., Ramachandran, H., and Amirul, A.A. (2017). Complete Genome Sequences of Three Cupriavidus Strains Isolated from Various Malaysian Environments. Genome Announc 5(3). doi: 10.1128/genomeA.01498-16.
Shan, W., Yang, X., Ma, W., Yang, Y., Guo, X., Guo, J., et al. (2013). Draft Genome Sequence of Ralstonia solanacearum Race 4 Biovar 4 Strain SD54. Genome Announc 1(6). doi: 10.1128/genomeA.00890-13.
Suenaga, H., Yamazoe, A., Hosoyama, A., Kimura, N., Hirose, J., Watanabe, T., et al. (2015). Draft Genome Sequence of the Polychlorinated Biphenyl-Degrading Bacterium Cupriavidus basilensis KF708 (NBRC 110671) Isolated from Biphenyl-Contaminated Soil. Genome Announc 3(2). doi: 10.1128/genomeA.00143-15.
Suzuki, M., Nishio, H., Asagoe, K., Kida, K., Suzuki, S., Matsui, M., et al. (2015). Genome Sequence of a Carbapenem-Resistant Strain of Ralstonia mannitolilytica. Genome Announc 3(3). doi: 10.1128/genomeA.00405-15.
Utturkar, S.M., Bollmann, A., Brzoska, R.M., Klingeman, D.M., Epstein, S.E., Palumbo, A.V., et al. (2013). Draft Genome Sequence for Ralstonia sp. Strain OR214, a Bacterium with Potential for Bioremediation. Genome Announc 1(3). doi: 10.1128/genomeA.00321-13.
Vaz-Moreira, I., Tamames, J., Martinez, J.L., and Manaia, C.M. (2016). Draft Genome Sequences of Two Ralstonia pickettii Strains with Different Aminoglycoside Resistance Phenotypes. Genome Announc 4(6). doi: 10.1128/genomeA.01257-16.
Vilo, C., Benedik, M.J., Ilori, M., and Dong, Q. (2014a). Draft Genome Sequence of Cupriavidus sp. Strain SK-3, a 4-Chlorobiphenyl- and 4-Clorobenzoic Acid-Degrading Bacterium. Genome Announc 2(4). doi: 10.1128/genomeA.00664-14.
Vilo, C., Benedik, M.J., Ilori, M., and Dong, Q. (2014b). Draft Genome Sequence of Cupriavidus sp. Strain SK-4, a di-ortho-Substituted Biphenyl-Utilizing Bacterium Isolated from Polychlorinated Biphenyl-Contaminated Sludge. Genome Announc 2(3). doi: 10.1128/genomeA.00474-14.
Wang, S., Bai, N., Wang, B., Feng, Z., Hutchins, W.C., Yang, C.H., et al. (2015a). Characterization of the molecular degradation mechanism of diphenyl ethers by Cupriavidus sp. WS. Environ Sci Pollut Res Int 22(21), 16914-16926. doi: 10.1007/s11356-015-4854-3.
Wang, X., Chen, M., Xiao, J., Hao, L., Crowley, D.E., Zhang, Z., et al. (2015b). Genome Sequence Analysis of the Naphthenic Acid Degrading and Metal Resistant Bacterium Cupriavidus gilardii CR3. PLoS One 10(8), e0132881. doi: 10.1371/journal.pone.0132881.
Watahiki, S., and Kimura, N. (2017). Draft Genome Sequence of a Caffeine-Utilizing Bacterium, Cupriavidus sp. Strain D384. Genome Announc 5(20). doi: 10.1128/genomeA.00370-17.
Watanabe, T., Yamazoe, A., Hosoyama, A., Fujihara, H., Suenaga, H., Hirose, J., et al. (2015). Draft Genome Sequence of Cupriavidus pauculus Strain KF709, a Biphenyl-Utilizing Bacterium Isolated from Biphenyl-Contaminated Soil. Genome Announc 3(2). doi: 10.1128/genomeA.00222-15.
Weibel, J., Tran, T.M., Bocsanczy, A.M., Daughtrey, M., Norman, D.J., Mejia, L., et al. (2016). A Ralstonia solanacearum Strain from Guatemala Infects Diverse Flower Crops, Including New Asymptomatic Hosts Vinca and Sutera, and Causes Symptoms in Geranium, Mandevilla Vine, and New Host African Daisy (Osteospermum ecklonis). Plant Health Progress 17(2), 114-121. doi: 10.1094/PHP-RS-16-0001.
Xu, J., Zheng, H.J., Liu, L., Pan, Z.C., Prior, P., Tang, B., et al. (2011). Complete genome sequence of the plant pathogen Ralstonia solanacearum strain Po82. J Bacteriol 193(16), 4261-4262. doi: 10.1128/jb.05384-11.
Xu, Y., Nagy, A., Yan, X., Haley, B.J., Kim, S.W., Liu, N.T., et al. (2016). Genome Sequences of Ralstonia insidiosa Type Strain ATCC 49129 and Strain FC1138, a Strong Biofilm Producer Isolated from a Fresh-Cut Produce-Processing Plant. Genome Announc 4(4). doi: 10.1128/genomeA.00847-16.
Yonezuka, K., Shimodaira, J., Tabata, M., Nagase, S., Kasai, D., Hosoyama, A., et al. (2016). Draft Genome Sequence of a Chlorinated-Ethene Degrader, Cupriavidus necator Strain PHE3-6 (NBRC 110655). Genome Announc 4(2). doi: 10.1128/genomeA.01743-15.
Yuan, K.X., Cullis, J., Levesque, C.A., Tambong, J., Chen, W., Lewis, C.T., et al. (2015). Draft Genome Sequences of Ralstonia solanacearum Race 3 Biovar 2 Strains with Different Temperature Adaptations. Genome Announc 3(4). doi: 10.1128/genomeA.00815-15.
Zhang, L., Morrison, M., and Rickard, C.M. (2014). Draft Genome Sequence of Ralstonia pickettii AU12-08, Isolated from an Intravascular Catheter in Australia. Genome Announc 2(1). doi: 10.1128/genomeA.00027-14.
Zhu, M., McCully, L.M., Silby, M.W., Charles-Ogan, T.I., Huang, J., and Brigham, C.J. (2015). Draft Genome Sequence of Ralstonia sp. MD27, a Poly(3-Hydroxybutyrate)-Degrading Bacterium, Isolated from Compost. Genome Announc 3(5). doi: 10.1128/genomeA.01170-15.
Zou, C., Wang, K., Meng, J., Yuan, G., Lin, W., Peng, H., et al. (2016). Draft Genome Sequence of Ralstonia solanacearum Strain Rs-T02, Which Represents the Most Prevalent Phylotype in Guangxi, China. Genome Announc 4(2). doi: 10.1128/genomeA.00241-16.
